# Supplementary material for: Biliopancreatic Endoscopy in Altered Anatomy
Source: MDPI journal article supplement (doi:10.3390/medicina57101014), 2021-09-25
Supplement: s1 [file s1]

## Supplementary Materials

**Table S1.** Different success rate definitions per study.

| First name, year      | Procedural/ Technical success    | Definition                                                                                                                                                                                                                                              |
|-----------------------|----------------------------------|---------------------------------------------------------------------------------------------------------------------------------------------------------------------------------------------------------------------------------------------------------|
| Brozzi, 2021          | Overall: 78.2%                   | The percentage of cases with satisfactory visualization of the biliopancreatic target lesion/region according to the endosonographer                                                                                                                    |
| Ishihara, 2021        | 92%                              | Reaching the hepaticojejunostomy site                                                                                                                                                                                                                   |
| Kogure, 2021          | sDBE-ERCP 70.7% EUS-PD: 100%     | DB-ERCP: when scope insertion, pancreatic duct cannulation, and planned interventions were accomplished.<br>EUS-PD: when puncture of the pancreatic duct, insertion of the guidewire, and plastic stent/nasopancreatic catheter placement were achieved |
| Sato, 2020            | 89.2 %                           | The achievement of balloon dilation or plastic stent placement across the stricture via DB-ERCP                                                                                                                                                         |
| Mukai, 2019           | 91.9 %                           | The technical success of the creation of a hepatointeric tract was defined as successful stent placement in the bile duct                                                                                                                               |
| Fujimoto, 2018        | 80 %                             | The rate of successfully completed ERCP procedures                                                                                                                                                                                                      |
| Yamada, 2019          | sDBE: 150 (92%); cDBE: 145 (89%) | Success rate of pancreaticobiliary intervention                                                                                                                                                                                                         |
| Bowman, 2016          | 100 %                            | Biliary/pancreatic cannulation and intervention rate                                                                                                                                                                                                    |
| Grimes, 2015          | 95 %                             | Selective cannulation of biliary and/or pancreatic ducts                                                                                                                                                                                                |
| Bove, 2015            | 93.8 %                           | Successful cannulation/opacification of the desired biliopancreatic duct                                                                                                                                                                                |
| Shimatani, 2014       | 84.6 %                           | The therapeutic success rate was defined as the rate of accomplishment of ERCP-related interventions                                                                                                                                                    |
| Tomizawa, 2014        | 73 %                             | Overall SBE-assisted ERCP success rate                                                                                                                                                                                                                  |
| Lenze, 2014           | 57.7 %                           | Overall success rate                                                                                                                                                                                                                                    |
| Iwashita, 2013        | 100 %                            | Procedure success rate                                                                                                                                                                                                                                  |
| Lee, 2012             | 92.3 %                           | Selective CBD cannulation                                                                                                                                                                                                                               |
| Cho, 2011             | 24/25 (96 %)                     | Bile duct cannulation                                                                                                                                                                                                                                   |
| Wilson, 2010          | 139/188 (73.94%)                 | Successful imaging                                                                                                                                                                                                                                      |
| Wang, 2010            | 92.3 %                           | The reaching of the ampulla or hepaticojejunostomy                                                                                                                                                                                                      |
| Hakuta, 2020          | 79.93 %                          | A successful biliary or pancreatic cannulation, and subsequent stone removal, balloon dilation, or stent placement, if needed                                                                                                                           |
| Fugazza, 2020         | 100 %                            | Completion of all of the steps of u-ERCP                                                                                                                                                                                                                |
| Yane, 2017            | 81.8 %                           | Successful enteroscopy, with successful diagnostic and therapeutic interventions                                                                                                                                                                        |
| James, 2018           | 90 %                             | Completion of EUS-guided biliary stent placement from left intrahepatic duct into the gastrointestinal tract                                                                                                                                            |
| Bures, 2019           | 100 %                            | Therapeutic success                                                                                                                                                                                                                                     |
| Ali, 2018             | 86 %                             | The success rate for reaching the papilla                                                                                                                                                                                                               |
| Zouhairi, 2015        | 64.3%                            | The rate to successful complete the procedure                                                                                                                                                                                                           |
| Wagh, 2012            | 69 %                             | Endoscopic therapy successfully performed                                                                                                                                                                                                               |
| Law, 2013             | 100 %                            | NR                                                                                                                                                                                                                                                      |
| Kedia, 2015           | 100 %                            | Success in completing the procedure                                                                                                                                                                                                                     |
| Tyberg, 2016          | 100 %                            | Successful deployment of the LAMS                                                                                                                                                                                                                       |
| Ngamruengphong, 2017  | 100 %                            | Successful placement of the LAMS across the transgastric fistula                                                                                                                                                                                        |
| James and Baron, 2018 | 100 %                            | Success in completing the procedure                                                                                                                                                                                                                     |
| Bukhari, 2018         | 100 %                            | Successful cannulation of the selected duct with successful intervention as intended                                                                                                                                                                    |
| Chian, 2018           | 92.4 %                           | NR                                                                                                                                                                                                                                                      |
| Kedia, 2018           | 96.5 %                           | The success of excluded stomach access via EDGE gastrogastic fistula creation                                                                                                                                                                           |
| Wang, 2019            | 100 %                            | Success in completing the procedure                                                                                                                                                                                                                     |
| Hsueh, 2019           | 100 %                            | Clinical success: successful pancreaticobiliary cannulation and intervention. Technical success: successful fistula creation with 20 mm LAMS.                                                                                                           |
| Runge, 2020           | 98 %                             | Successful placement of a transmural LAMS followed by ERCP with cannulation of the intended duct and completion of the intended intervention(s).                                                                                                        |
| Krafft, 2019          | 100 %                            | Completion of the diagnostic and/or interventional endoscopic procedure by way of the endoscopically-created transmural fistula                                                                                                                         |
| Khara, 2021           | 100 % (Both LA-ERCP and EDGE)    | NR                                                                                                                                                                                                                                                      |

NR = Not reported

**Table S2.** Techniques and altered anatomy after-surgery.

| Technique               | Reconstructive procedures or surgical variants |             | Surgical technique                                                                                                                                                                                                                                                                                                                                                                                                                                                                                                                                                                                                                                                                                                            |
|-------------------------|------------------------------------------------|-------------|-------------------------------------------------------------------------------------------------------------------------------------------------------------------------------------------------------------------------------------------------------------------------------------------------------------------------------------------------------------------------------------------------------------------------------------------------------------------------------------------------------------------------------------------------------------------------------------------------------------------------------------------------------------------------------------------------------------------------------|
| Esophagectomy           | Total                                          |             | After esophagus resection, a short segment of the cervical esophagus is sutured with the upper part of the stomach (converted into a long tube), or with the colon or by transplanting a segment of small intestine. There are two approaches: open surgery or mini-invasive access. Open esophagectomy entails a large incisions in the neck, the chest or the abdomen (when all of those areas require an incision it is called a three-field esophagectomy). Minimally invasive esophagectomy is performed through several tiny incisions in the abdomen (laparoscopic) or the chest (thoracoscopic). Esophagectomy may be performed with a stomach-sparing technique, without affecting so much the biliopancreatic area. |
|                         | Distal                                         |             | Known as Ivor-Lewis esophagectomy, it consists of a resection of the distal third of the esophagus including part of the stomach, if involved in disease. Usually this procedure does not give any disadvantage for future endoscopic procedures.                                                                                                                                                                                                                                                                                                                                                                                                                                                                             |
| Gastrectomy             | Total                                          |             | Complete removal of stomach with different reconstruction techniques, as creating a pouch, which appears to have better functional outcomes and improved quality of life compared with other types of reconstruction. An Hunt-Lawrence type pouch with a Roux-en-Y jejuno-jejunal anastomosis is the preferred by many surgeons, because it seems to be the most effective. Straight esophagojejunal anastomosis, looped esophagojejunal anastomosis, jejunal interposition, colon interposition, and jejunal pouch construction are different options for restoration of gastrointestinal continuity. Jejunal pouch reconstruction, can be sited behind (Hunt) or in front (Rodino) of the colon.                            |
|                         | Sleeve                                         |             | It is a vertically oriented gastrectomy with removal of approximately 70 to 80 percent of the greater curvature of the stomach, resulting in the creation of a narrow gastric tube (the remnant stomach, called sometimes only “sleeve”) . It does not affect too much endoscopic procedures.                                                                                                                                                                                                                                                                                                                                                                                                                                 |
|                         | Partial                                        | Billroth I  | A surgical reconstruction which preserves duodenal and jejunal continuity by an end-to-end anastomosis between the remnant stomach and the duodenal stump.                                                                                                                                                                                                                                                                                                                                                                                                                                                                                                                                                                    |
|                         |                                                | Billroth II | An end-to-side anastomosis between the remnant stomach and the proximal jejunum. This reconstruction preserves jejunal but not duodenal continuity, creating a short afferent and an efferent limb.                                                                                                                                                                                                                                                                                                                                                                                                                                                                                                                           |
|                         |                                                | Roux-en-Y   | Roux-en-Y reconstruction consists of an afferent limb anastomosed to jejunal efferent limb, which is anastomosed with the remnant stomach. It permits a bilious drainage away from the gastric remnant, in order to reduce gastric biliary reflux.                                                                                                                                                                                                                                                                                                                                                                                                                                                                            |
| Pancreaticoduodenectomy | Conventional                                   |             | Conventional pancreaticoduodenectomy (cPD) (i.e. Whipple) consists of a distal gastrectomy with removal of the pancreatic head, duodenum, first 15 cm of the jejunum, common bile duct, and gallbladder. The variant pylorus-preserving pancreaticoduodenectomy keeps the gastric antrum, pylorus, and the proximal 2 to 3 cm of the duodenum, which is anastomosed to the jejunum to restore gastrointestinal continuity.                                                                                                                                                                                                                                                                                                    |
|                         | Piloro-preserving                              |             | Pylorus-preserving pancreaticoduodenectomy (ppPD) preserves the gastric antrum, pylorus, and up to 6 cm of the proximal duodenum, which is anastomosed to the jejunum.                                                                                                                                                                                                                                                                                                                                                                                                                                                                                                                                                        |
|                         | Subtotal stomach-preserving                    |             | The aim of this variant is to preserve as much stomach as possible.                                                                                                                                                                                                                                                                                                                                                                                                                                                                                                                                                                                                                                                           |
